# Supplementary material
Source: publisher figshare collection journal article supplement (https://tandf.figshare.com/ndownloader/files/37562933)
Supplement: Supplementary file 1 [file 37562933]

Table S3: literature observation on molecular docking studies and interactions compared to the 1MQ4 Aurora- A protein kinase with their other corresponding drug targets.

| **Inhibitors** | **Interacting residues** | **References** |
| --- | --- | --- |
| 4-(6,7-Dimethoxy-9H-1,3,9-triaza-fluoren-4yl)-piperazine-1-carbothioc acid (benzo [1,3] dioxol-5ylmethyl)-amide | Lys141 and Glu260 | Warner,S et al., 2006 |
| Bisferrocenyl ethynylanthracene | Gly140, Leu139, Lys141, Val147, Gly142, Ala160, Tyr212, Lys162, Ala213, Thr217, Gly216, Tyr219, Arg220, Leu263, Glu260 and Asp274 | Sing et al., 2018 |
| Felodipine | His100, Lys156, Phe157, Ile158 and Tyr212 | Karthigeyan, D et al., 2014 |
| VX-680 | Glu181 and Lys162 | Chate, A et al., 2021 |
